# Supplementary material
Source: publisher site journal article supplement (https://www.dovepress.com/article/297329)
Supplement: Supplementary file 1 [file get_supplementary_file.php]

**Supplementary Table 1.***Analysis of the certainty score based on percentage of enrichment of cultures*

|                                  | no (N=35)         | yes (N=15)        | Total (N=50)      | p value |
|----------------------------------|-------------------|-------------------|-------------------|---------|
| <b>Germ</b>                      |                   |                   |                   | 0.441   |
| Candida parapsilosis             | 2 (5.7%)          | 0 (0.0%)          | 2 (4.0%)          |         |
| Clostridium spezieis             | 0 (0.0%)          | 1 (6.7%)          | 1 (2.0%)          |         |
| Cornyebacterium aurimucosum      | 1 (2.9%)          | 0 (0.0%)          | 1 (2.0%)          |         |
| Enterobacter cloacae             | 1 (2.9%)          | 0 (0.0%)          | 1 (2.0%)          |         |
| Enterococcus faecalis            | 2 (5.7%)          | 0 (0.0%)          | 2 (4.0%)          |         |
| Pantoea agglomerans              | 1 (2.9%)          | 0 (0.0%)          | 1 (2.0%)          |         |
| Propionibacterium acnes          | 1 (2.9%)          | 0 (0.0%)          | 1 (2.0%)          |         |
| Proteus mirabilis                | 1 (2.9%)          | 0 (0.0%)          | 1 (2.0%)          |         |
| Staphylococcus aureus            | 2 (5.7%)          | 0 (0.0%)          | 2 (4.0%)          |         |
| Staphylococcus aureus, MRSA      | 1 (2.9%)          | 0 (0.0%)          | 1 (2.0%)          |         |
| Staphylococcus capitis           | 5 (14.3%)         | 2 (13.3%)         | 7 (14.0%)         |         |
| Staphylococcus caprae            | 2 (5.7%)          | 0 (0.0%)          | 2 (4.0%)          |         |
| Staphylococcus cohnii            | 2 (5.7%)          | 0 (0.0%)          | 2 (4.0%)          |         |
| Staphylococcus epidermidis       | 10 (28.6%)        | 7 (46.7%)         | 17 (34.0%)        |         |
| Staphylococcus epidermidis group | 0 (0.0%)          | 2 (13.3%)         | 2 (4.0%)          |         |
| Staphylococcus haemolyticus      | 1 (2.9%)          | 0 (0.0%)          | 1 (2.0%)          |         |
| Staphylococcus hominis           | 1 (2.9%)          | 0 (0.0%)          | 1 (2.0%)          |         |
| Staphylococcus lentus            | 0 (0.0%)          | 1 (6.7%)          | 1 (2.0%)          |         |
| Staphylococcus lugdunensis       | 0 (0.0%)          | 1 (6.7%)          | 1 (2.0%)          |         |
| Staphylococcus pettenkoferi      | 0 (0.0%)          | 1 (6.7%)          | 1 (2.0%)          |         |
| Streptococcus agalactiae         | 1 (2.9%)          | 0 (0.0%)          | 1 (2.0%)          |         |
| Streptococcus group C (hem)      | 1 (2.9%)          | 0 (0.0%)          | 1 (2.0%)          |         |
| <b>Group</b>                     |                   |                   |                   | 0.175   |
| Anaerobes                        | 0 (0.0%)          | 1 (6.7%)          | 1 (2.0%)          |         |
| Candida parapsilosis             | 2 (5.7%)          | 0 (0.0%)          | 2 (4.0%)          |         |
| Enterobacterales                 | 3 (8.6%)          | 0 (0.0%)          | 3 (6.0%)          |         |
| Enterococcus faecalis            | 2 (5.7%)          | 0 (0.0%)          | 2 (4.0%)          |         |
| Other gram-positive bacteria     | 4 (11.4%)         | 0 (0.0%)          | 4 (8.0%)          |         |
| Staph. epidermidis group         | 21 (60.0%)        | 14 (93.3%)        | 35 (70.0%)        |         |
| Staphylococcus aureus            | 3 (8.6%)          | 0 (0.0%)          | 3 (6.0%)          |         |
| <b>Certainty</b>                 |                   |                   |                   | 0.041   |
| Min                              | 0.42              | 0.42              | 0.42              |         |
| Max                              | 2.49              | 1.41              | 2.49              |         |
| Median (IQR)                     | 1.00 (0.42, 2.49) | 0.71 (0.42, 1.41) | 1.00 (0.42, 2.49) |         |
| Mean (95% CI)                    | 1.06 (0.90, 1.22) | 0.78 (0.64, 0.93) | 0.98 (0.85, 1.10) |         |
| <b>Consolidation</b>             |                   |                   |                   | 0.199   |
| no                               | 15 (42.9%)        | 3 (20.0%)         | 18 (36.0%)        |         |
| yes                              | 20 (57.1%)        | 12 (80.0%)        | 32 (64.0%)        |         |

**Supplementary Table 2.***Outcome of the mathematical modelling*

|                       | Model A: Time to consolidation | Model B: Prediction of consolidation |
|-----------------------|--------------------------------|--------------------------------------|
| ASA                   | -0.49<br>CI [-0.97, 0.00]      |                                      |
| Age                   | -0.41<br>CI [-0.89, 0.08]      | -1.32 *<br>CI [-2.53, -0.10]         |
| Smoking               |                                | -2.42 *<br>CI [-4.65, -0.19]         |
| Diabetes              | 2.96 *<br>CI [0.29, 5.64]      | -3.07 *<br>CI [-6.00, -0.14]         |
| BMI                   |                                | -1.42 *<br>CI [-2.71, -0.13]         |
| N                     | 30                             | 42                                   |
| R2                    | 0.38                           |                                      |
| AIC                   | 102.75                         | 39.30                                |
| BIC                   | 109.76                         | 47.99                                |
| Pseudo R <sup>2</sup> |                                | 0.56                                 |

All continuous predictors are mean-centered and scaled by 1 standard deviation.

\*\*\* p < 0.001; \*\* p < 0.01; \* p < 0.05.
